# Supplementary material for: Palladium on Layered Double Hydroxide: A Heterogeneous System for the Enol Phosphate Carbon-Oxygen Bond Activation in Aqueous Media
Source: Hindawi journal article supplement (doi:10.1155/2017/8418939), 2017-01-01

## Supplementary Information

### Palladium on layered double hydroxide: a heterogeneous system for the enol phosphate carbon-oxygen bond activation in aqueous media

Jaqueline D. Senra, Raquel V. Santos, Aires C. Silva, Alessandro B. C. Simas, Luiz Fernando B. Malta

|                                          |    |
|------------------------------------------|----|
| Spectroscopic data for the products..... | 2  |
| <sup>1</sup> H NMR of <b>2a</b> .....    | 3  |
| <sup>1</sup> H NMR of <b>2b</b> .....    | 4  |
| <sup>1</sup> H NMR of <b>3a</b> .....    | 5  |
| <sup>1</sup> H NMR of <b>3b</b> .....    | 6  |
| <sup>1</sup> H NMR of <b>3c</b> .....    | 7  |
| <sup>1</sup> H NMR of <b>4a</b> .....    | 8  |
| <sup>1</sup> H NMR of <b>4b</b> .....    | 9  |
| <sup>1</sup> H NMR of <b>4c</b> .....    | 10 |

## Spectroscopic data for the products

*N*-acetyl-4-methoxyaniline (**2a**). Yellow solid, 80%. <sup>1</sup>H NMR (CDCl<sub>3</sub>, 400MHz, δ ppm): 7.38 (d, *J* = 7.4 Hz, 2H), 6.83 (d, *J* = 6.5 Hz, 2H), 3.78 (s, 3H), 2.13 (s, 3H).

*N*-acetyl, *N'*-carboxybenzyl-4-methoxyaniline (**3a**). Pale yellow oil, 64%. <sup>1</sup>H NMR (CDCl<sub>3</sub>, 400MHz, δ ppm): 7.38 (m, 3H), 7.19 (d, *J* = 8.7 Hz, 2H) 7.1 (d, *J* = 7.4 Hz, 2H), 6.89 (d, *J* = 8.7 Hz, 2H), 5.22 (d, 2H), 3.81 (s, 3H), 2.63 (s, 3H).

*N*-acetyl, *N'*-carboxybenzyl-2-bromoaniline (**3b**). Pale yellow oil, 45%. <sup>1</sup>H NMR (CDCl<sub>3</sub>, 400MHz, δ ppm): 7.66 (d, *J* = 7.9 Hz, 1H), 7.4 – 7.19 (m, 8H), 2.68 (s, 3H).

*N*-acetyl, *N'*-tert-butyloxycarbonyl-2-bromoaniline (**3c**). Pale yellow solid, 88%. <sup>1</sup>H NMR (CDCl<sub>3</sub>, 400MHz, δ ppm): 7.62 (d, *J* = 7.5 Hz, 1H), 7.35 (dd, *J* = 7.8 Hz, *J* = 7.5 Hz, 1H), 7.28 – 7.13 (m, 3H), 2.63 (s, 3H), 1.38 (s, 9H).

*Enol phosphate 4a*. Pale yellow oil, 72%. <sup>1</sup>H NMR (CDCl<sub>3</sub>, 400 MHz, δ ppm): 7.35–7.06 (m, 9H), 6.80 (d, *J* = 12.1 Hz, 2H), 5.26 (s, 1H), 5.15 (s, 2H), 4.89 (dd, *J* = 3.0 Hz, *J* = 2.0 Hz, 1H), 3.79–3.76 (s, 3H).

*Enol phosphate 4c*. Pale yellow solid, 78%. <sup>1</sup>H NMR (CDCl<sub>3</sub>, 400 MHz, δ ppm): 7.58 (d, *J* = 7.6 Hz, 1H), 7.39–7.1 (m, 13H), 5.11 (s, 1H), 4.99 (d, *J* = 2.0 Hz, 1H), 1.43 (s, 3H).

Product **6a**. Pale yellow oil, 72%. <sup>1</sup>H NMR (CDCl<sub>3</sub>, 400 MHz, δ ppm): 8.29 (d, *J* = 7.9 Hz, 2H), 7.55 (t, *J* = 7.0 Hz, 2H), 7.4 – 7.05 (m, 8H), 6.89 (d, *J* = 7.0 Hz, 2H), 5.31 (d, 2H), 5.19 (s, 2H), 5.15 (d, *J* = 3.0 Hz, 1H), 3.8 (s, 3H).

Product **8**. Pale yellow solid, 64%. <sup>1</sup>H NMR (CDCl<sub>3</sub>, 400 MHz, δ ppm): 8.2 (d, *J* = 7.9 Hz, 2H), 7.55 – 7.20 (m, 8H), 6.56 (s, 1H), 1.55 (s, 9H).

## References

[1] H. Fuwa; M. Sasaki, “Synthesis of 2-Substituted Indoles and Indolines via Suzuki-Miyaura Coupling/5-endo-trig Cyclization Strategies”, The Journal of Organic Chemistry, vol. 74, pp. 212–221, 2009.

[2] A. B. C. Simas, D. L. Sales, K. C. Pais, “Acyclic ketene aminal phosphates derived from *N,N*-diprotected acetamides: stability and cross-couplings”, Tetrahedron Letters, vol. 50, pp. 6977–6980, 2009.

*N*-acetyl-4-methoxyaniline (**2a**)

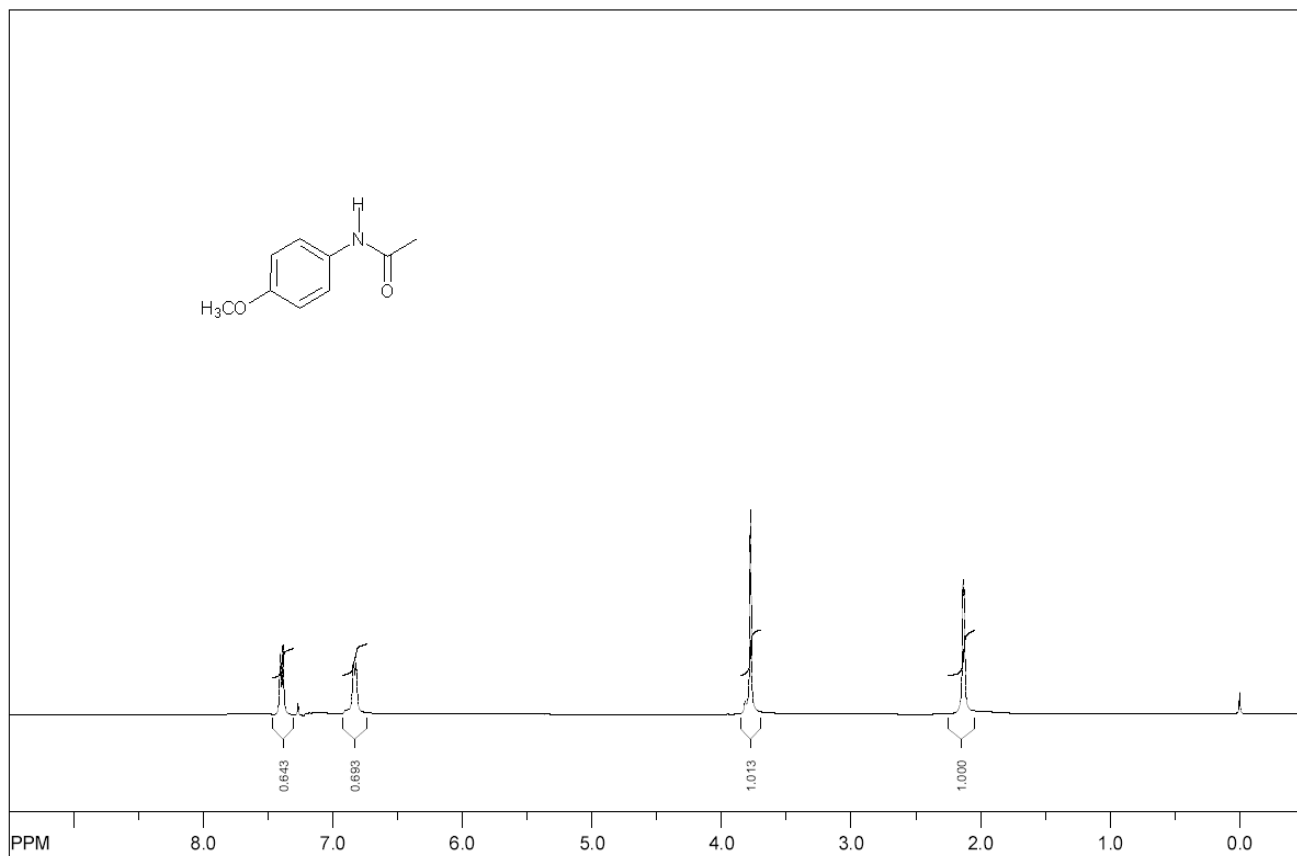

*N*-acetyl, *N'*-carboxybenzyl-4-methoxyaniline (**3a**)

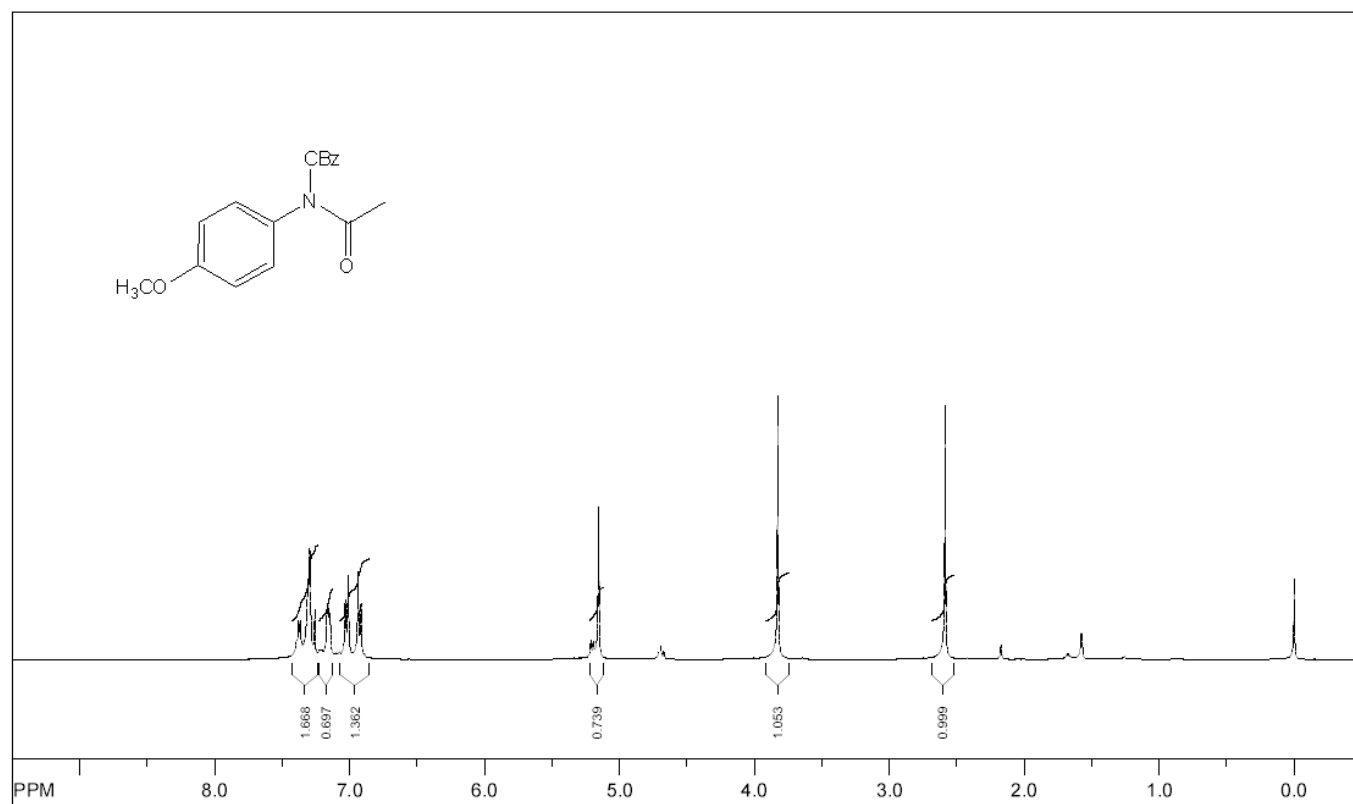

*N*-acetyl, *N*'-carboxybenzyl-2-bromoaniline (**3b**)

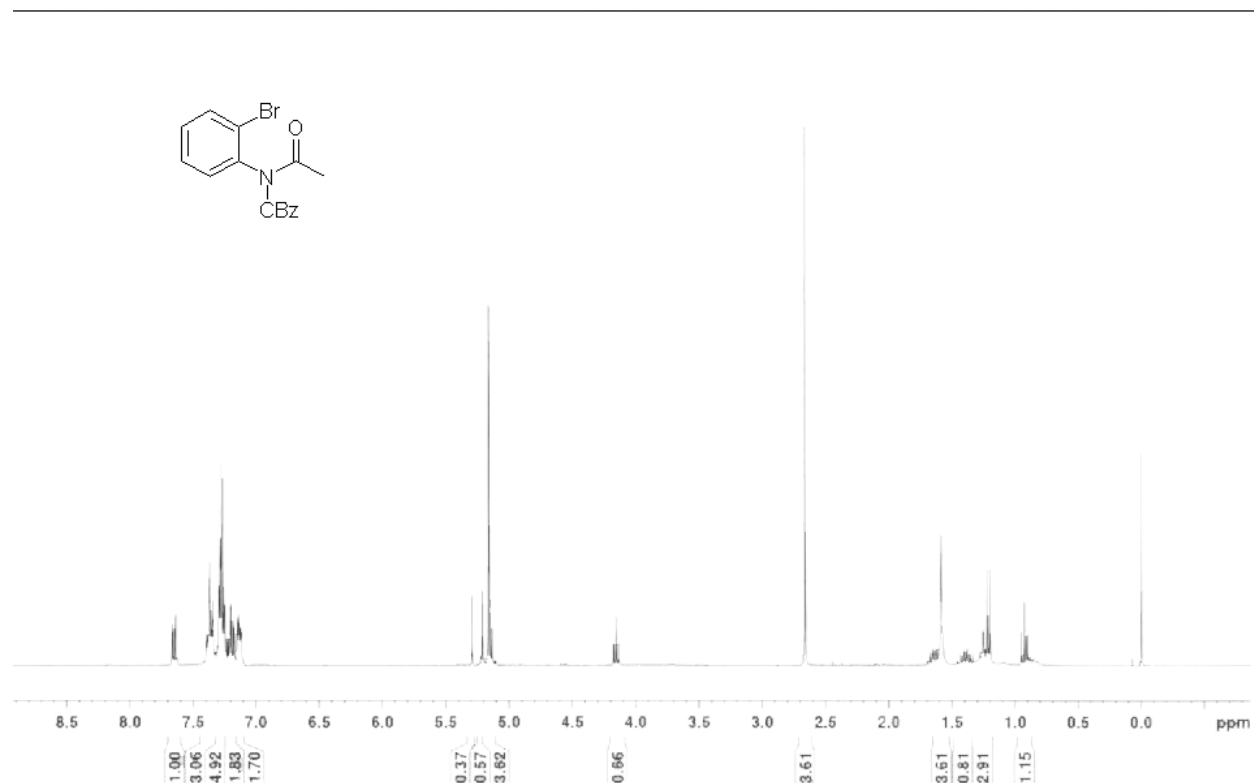

*N*-acetyl, *N'*-*tert*-butoxycarbonyl-2-bromoaniline (**3c**)

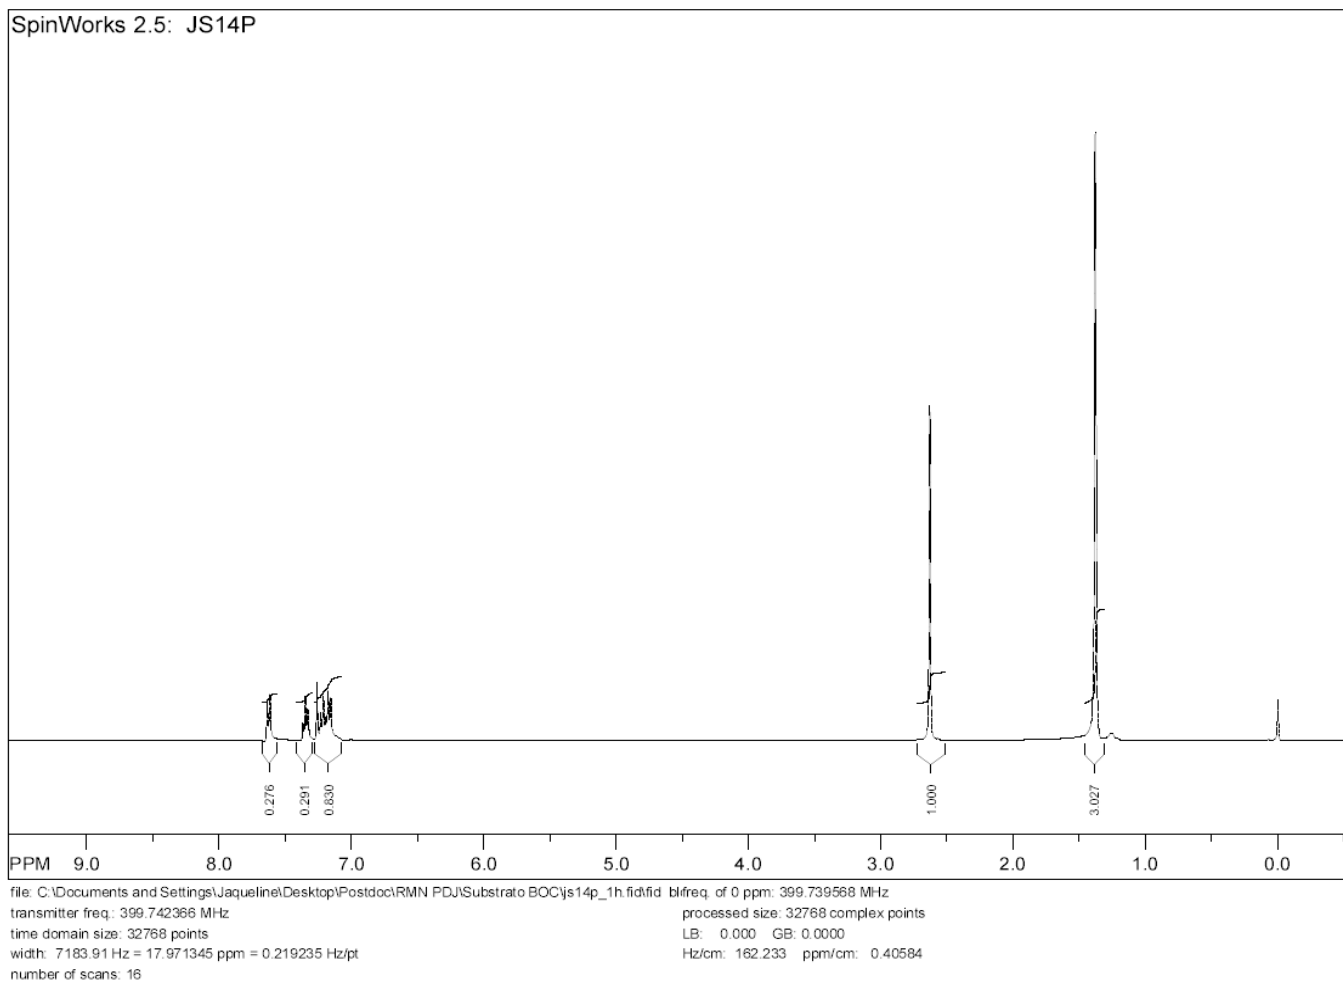

*Enol phosphate 4a*

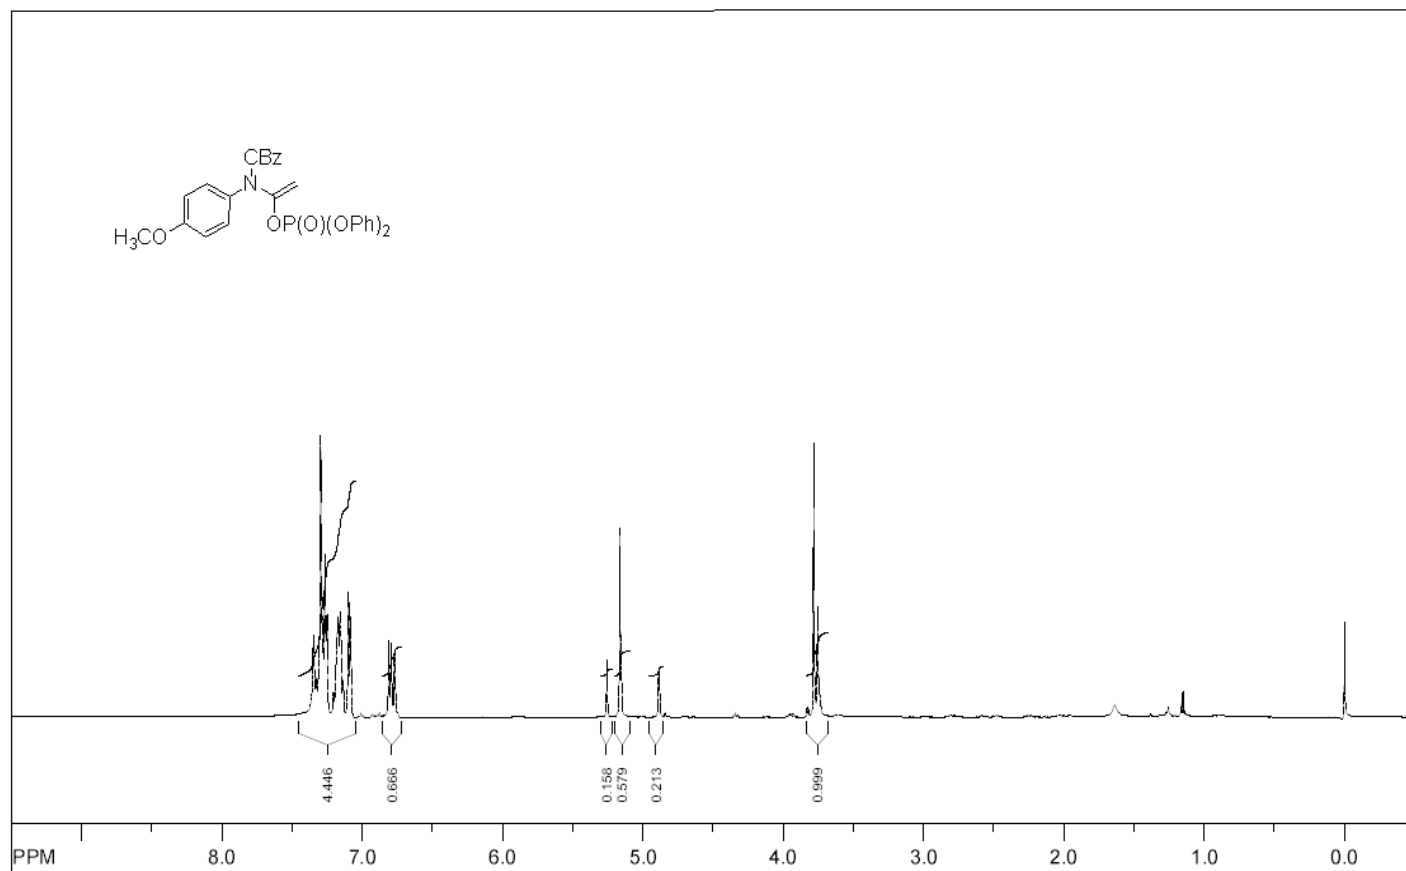

Enol phosphate **4c**

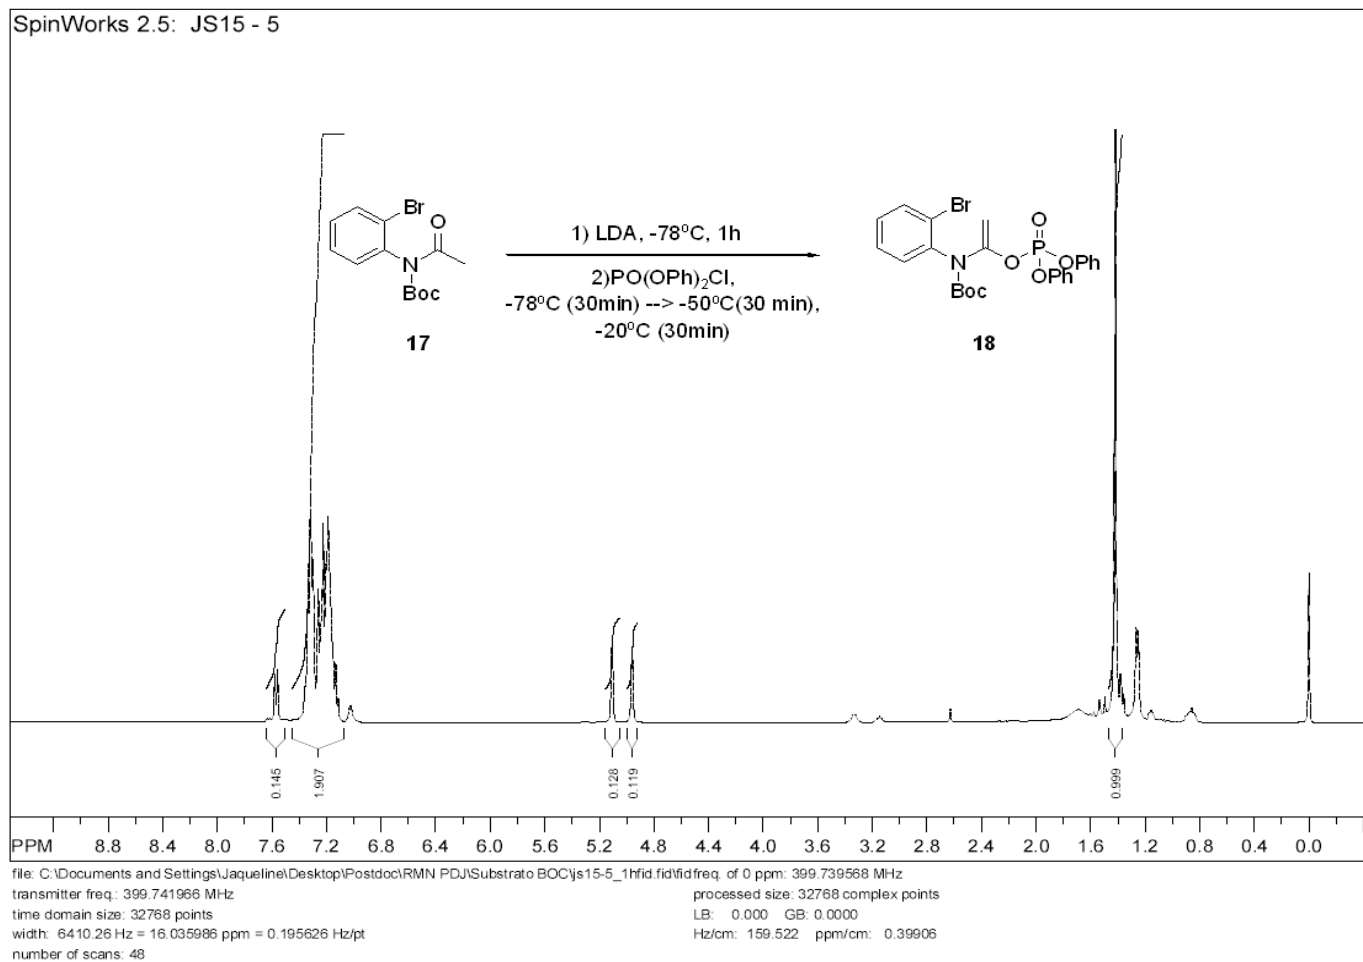



## Product 6a

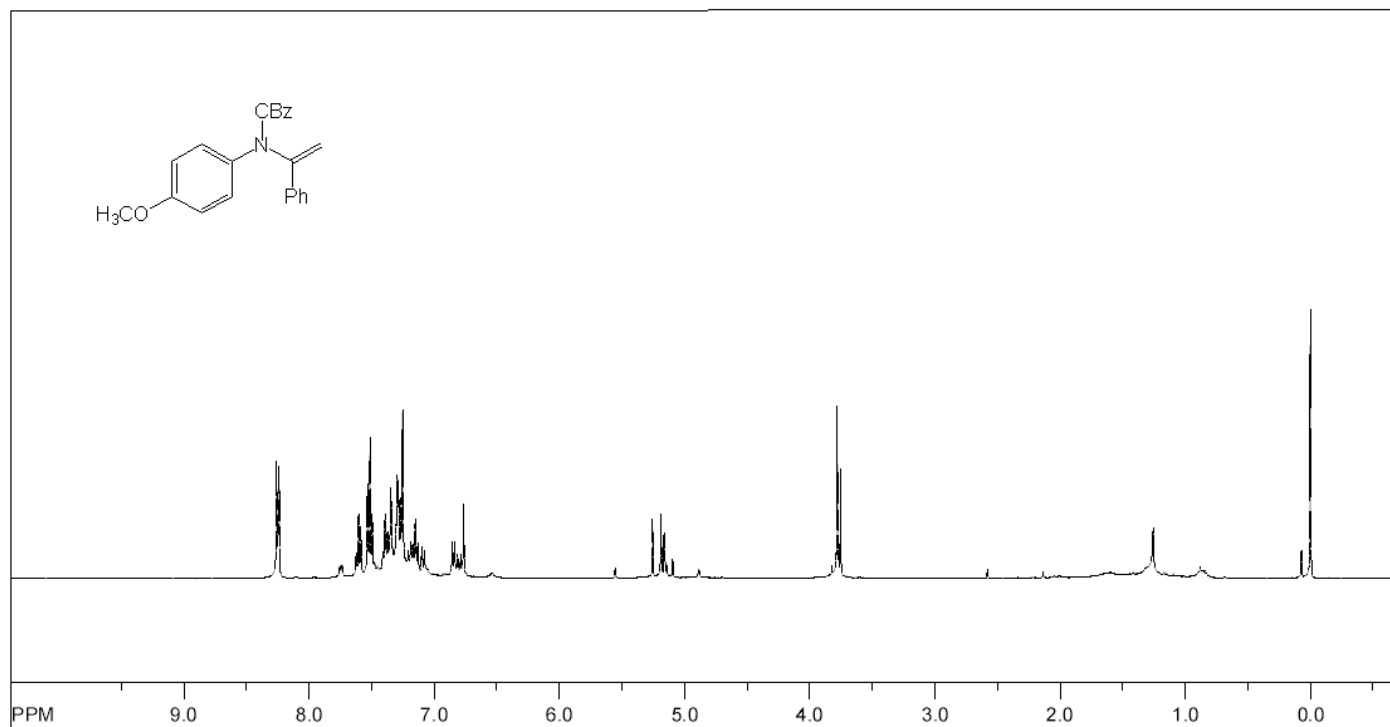

## Product 8

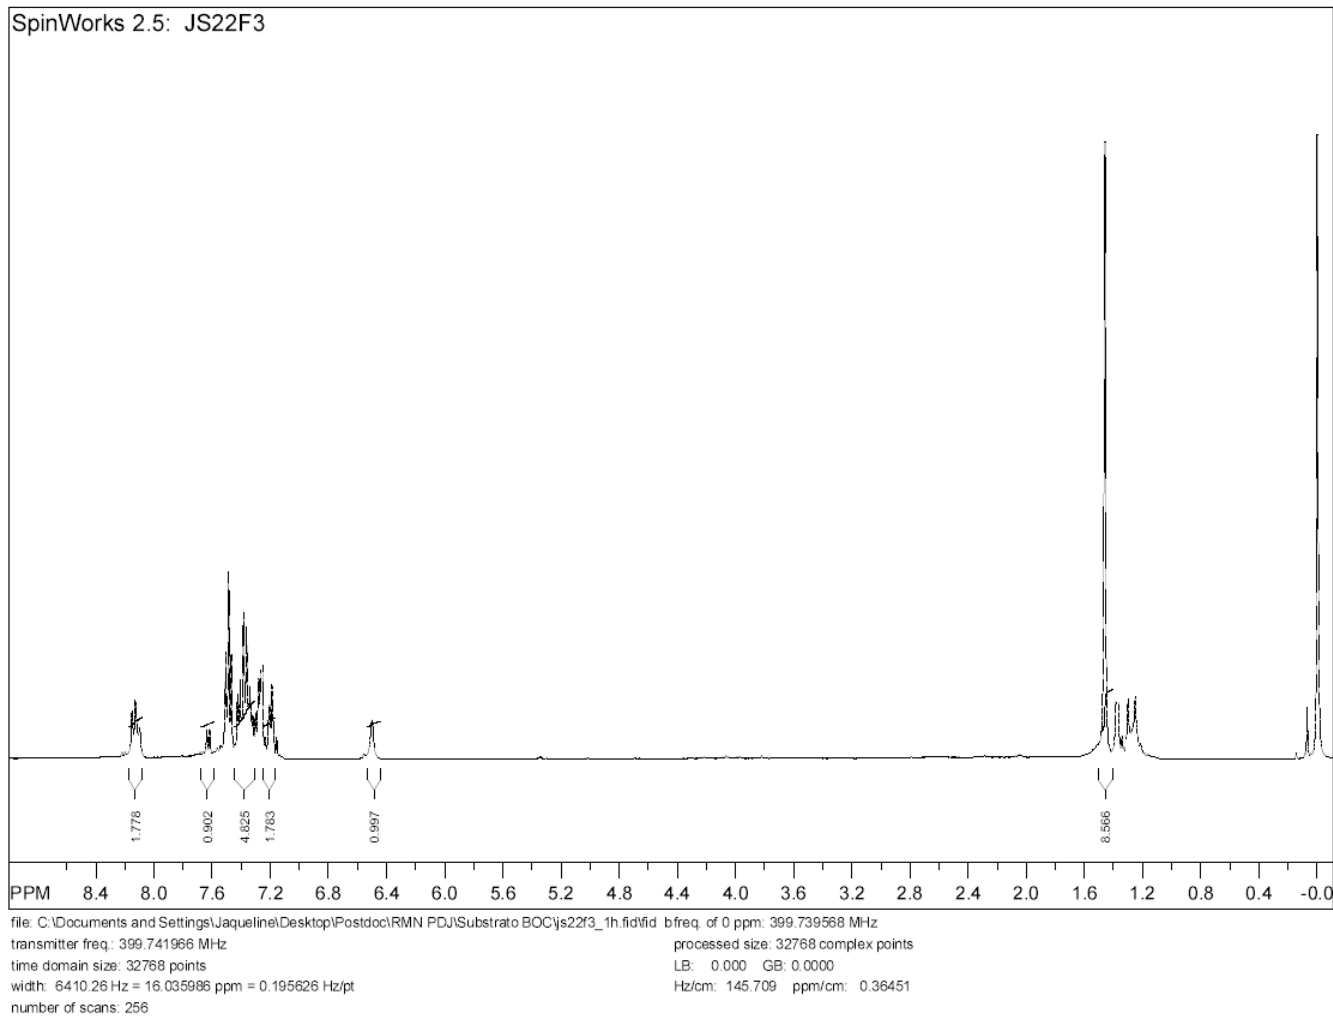

Supplement: f1 [file 8418939.f1.pdf]
